# Supplementary material for: Investigation of the Effect of Emotional Eating Habits on Obesity
Source: Research Square preprint supplement (doi:10.21203/rs.3.rs-6920990/v1), 2025-08-11
Supplement: Supplementary file 1 [file c3208ba1b382ca2824e01067.docx]

**Investigation Of The Effect Of Emotional Eating Habits On Obesity**

**Highlights**

- Emotional eating behaviors were observed in both obese and normal-weight individuals.
- Cognitive restraint, emotional eating, and uncontrolled eating scores were higher in obese participants.
- No statistically significant difference was found in emotional eating scores between groups (p>0.05).
- Emotional eating was shown to be independent of BMI classification.
- Obese individuals exhibited higher coping and reward-based eating motivations.
